# Supplementary material
Source: PubMed Central journal article supplement (PMC2620723)
Supplement: supp_75_2_337__1.pdf [file supp_75_2_337__1.pdf]

1. Library creation and selection

*P. putida* GPo12 (pGEc47ΔB) pCom8\_cyp153A6  
adapted clone

2. Separation and identification

Pcyp1  
adapted host

pCom8\*  
adapted vector

*cyp153A6-BMO1* operon  
encodes evolved variant

3. Strain assembly

Pcyp1 pCom8\*\_cyp153A6-BMO1

4. Library creation and selection

Pcyp1 pCom8\*\_cyp153A6-BMO1  
adapted clone

5. Separation and identification

Pcyp2  
adapted host

pCom8\*\_cyp153A6-BMO1  
no improvement

6. Strain assembly

Pcyp2 pCom8\*\_cyp153A6-BMO1  
adapted strain utilized for growth tests
