# Supplementary material
Source: PubMed Central journal article supplement (PMC2620723)
Supplement: supp_75_2_337__2.pdf [file supp_75_2_337__2.pdf]

1. Library creation and selection

*P. putida* GPo12 (pGEc47ΔB) pCom10\_alkB  
adapted clone

2. Separation and identification

Palk1  
adapted host

pCom10  
no improvement

*alkB-BMO1*  
encodes evolved variant

3. Strain assembly

Palk1 pCom10\_alkB-BMO1

4. Library creation and selection

Palk1 pCom10\_alkB-BMO1  
adapted clone

5. Separation and identification

Palk1  
no improvement

pCom10  
no improvement

*alkB-BMO2*  
encodes evolved variant

6. Strain assembly

Palk1 pCom10\_alkB-BMO2  
adapted strain utilized for growth tests
