# Supplementary material
Source: PubMed Central journal article supplement (PMC2620723)

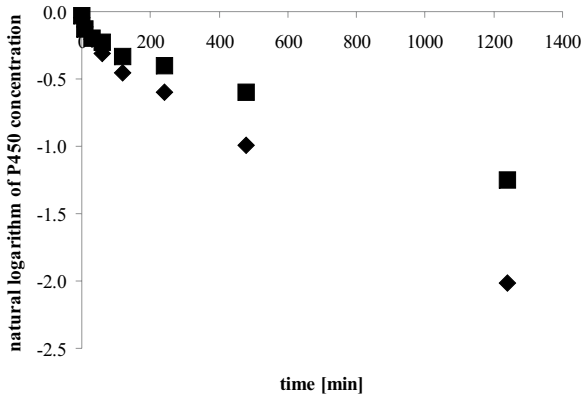

Supplement: supp_75_2_337__3.pdf [file supp_75_2_337__3.pdf]
